1 **Title:** The effect of yoga and aerobic exercise on children’s physical activity in rural India: a  
2 randomized controlled trial

3  
4 **Authors:**

5 Tarun Reddy Katapally<sup>1-4\*</sup>, Jamin Patel<sup>1,2</sup>, Sheriff Tolulope Ibrahim<sup>1,3</sup>, Sonal Kasture<sup>4</sup>, Anuradha  
6 Khadilkar<sup>4</sup>, Jasmin Bhawra<sup>4,5</sup>

7 <sup>1</sup>DEPtH Lab, Faculty of Health Sciences, Western University, London, Ontario, Canada

8 <sup>2</sup>Department of Epidemiology and Biostatistics, Schulich School of Medicine and Dentistry,  
9 Western University, London, Ontario, Canada N6A 3K7

10 <sup>3</sup>Children’s Health Research Institute, Lawson Health Research Institute, 750 Base Line Road  
11 East, Suite 300, London, Ontario, Canada N6C 2R5

12 <sup>4</sup>Hirabai Cowasji Jehangir Medical Research Institute, Pune, Maharashtra, India

13 <sup>5</sup>CHANGE Research Lab, School of Occupational and Public Health, Toronto Metropolitan  
14 University, Toronto, Ontario, Canada

15  
16 **Corresponding author\*:**

17 Tarun Reddy Katapally, Ph.D.

18 DEPtH Lab, Faculty of Health Sciences  
19 Western University

20 1151 Richmond St, London, ON N6A 5B9

21 London, Ontario, Canada

22 E-mail: [tarun.katapally@uwo.ca](mailto:tarun.katapally@uwo.ca)

23  
24 **Keywords:** aerobic exercise; children’s health; global south; physical activity; yoga

25  
26  
27  
28  
29  
30  
31  
32  
33  
34  
35  
36

37 **Abstract**

38 **Purpose:** The objective of this study was to test the effect of both yoga and aerobic exercise on  
39 children's moderate-to-vigorous physical activity (MVPA) in rural India.

40 **Methods:** The study utilized secondary data from a randomized, controlled, open-labelled, single-  
41 center, two-site, parallel-group trial. The study was conducted in rural India over a 6-month period  
42 between 2018-2019. Children aged 6 to 11 years were randomized into three groups: aerobic  
43 exercise (30 minutes, 5 days/week), control (no intervention), and yoga (30 minutes, 5 days/week).  
44 MVPA was measured at baseline and at six months using the Quantification of Physical Activity  
45 in School Children and Adolescents survey adapted and validated for Indian children. Overall  
46 sample and gender-segregated data were analyzed using paired sample t-tests and one-way  
47 analysis of variance with post-hoc analyses.

48 **Findings:** In the overall sample (N=151), mean MVPA (minutes/day) increased significantly in  
49 both yoga (n=50;  $p<0.001$ ) and aerobic exercise (n=49;  $p<0.001$ ) groups from baseline to endline.  
50 Among males, mean MVPA increased significantly from baseline to endline in all three groups,  
51 including the control group (n=23;  $p=0.005$ ). Among females, mean MVPA increased only in the  
52 yoga group, with baseline to endline change being significant across the three groups ( $p=0.005$ ),  
53 and with the yoga group depicting greater change in comparison to the control group ( $p=0.004$ ).

54 **Conclusions:** Our findings suggest that both yoga and aerobic exercise can increase MVPA among  
55 rural children, with yoga being particularly beneficial for girls – a significant finding to inform  
56 culturally-appropriate active living policies to minimize the current physical activity gender gap  
57 in India. These findings can have implications for public health programs and policies not only in  
58 India but across other rural areas worldwide, where similar challenges in promoting physical  
59 activity among children may exist.

60  
61 **Keywords:** aerobic exercise; children's health; global south; physical activity; yoga

62  
63  
64  
65

## 66 **1. Introduction**

67 Physical inactivity is a major contributor to global non-communicable diseases (NCD), [1–3] with  
68 an estimated mortality burden of 3.2 million deaths per year [4]. Physical inactivity is a significant  
69 concern in pediatric populations as it has been linked to the prevalence of NCDs in adulthood [5–  
70 7]. Between 2020 and 2030, the cumulative economic cost of India’s physical inactivity is  
71 projected to be USD 35.4 billion [6]. Evidence indicates that physical activity among children and  
72 youth in India has consistently decreased since 2016, especially during the coronavirus disease  
73 pandemic.[8–10] This decline in physical activity poses a critical challenge for pediatric healthcare  
74 providers and policymakers in promoting and facilitating active lifestyles among children [11–13].

75 Child and youth physical activity is below recommended guidelines [8–10] despite growing  
76 policies and programs [10], which range from school educational curricula and governmental  
77 investments in sports infrastructure [10] to comprehensive sports programs [14], and physical  
78 education interventions across India [15,16]. Culturally-appropriate strategies, which consider the  
79 identity and heritage of global south populations need to be considered seriously to reverse this  
80 growing physical inactivity trend [10,17–19]. Given its historical and cultural significance, yoga  
81 has the potential to serve as a complementary medicine practice to promote physical activity  
82 among Indian children in particular [10,19,20]. Both breathing (pranayama), and physical  
83 techniques (asanas) [21] have been shown to improve motor function [22–24], muscle strength  
84 [22,25], and mental health [22,26,27] among Indian children and youth.

85 While the benefits of yoga are well-established, irrespective of the type of yoga practice [28],  
86 currently there is no concrete evidence linking yoga with moderate to vigorous physical activity  
87 (MVPA) among children and youth – a key indicator informing global physical activity guidelines  
88 [29,30]. Some preliminary correlational evidence is being explored [20], however; it is important  
89 to establish empirical evidence via randomized controlled trials to understand these relationships  
90 better. We hypothesize that while the practice of yoga itself can result in the accumulation of more  
91 MVPA [31], yoga practice can inherently influence other active living behaviours [32–34], which  
92 might enhance MVPA. However, it is critical to test this hypothesis in parallel with the effect of  
93 aerobic exercise on MVPA, with the obvious hypothesis being that aerobic exercise would increase  
94 MVPA [5,29]. It is also important to understand gender variations of the impact of yoga on MVPA  
95 to inform healthcare strategies, policies, and programs that promote equitable promotion of MVPA

96 among girls in India – who are generally less physically active than Indian boys [9,10]. Thus, as  
97 part of a randomized controlled study, our objective is to investigate the influence of yoga and  
98 aerobic exercise on MVPA of children in rural India, while exploring gender variations of this  
99 effect.

## 100 **2. Methods**

### 101 **2.1 Study design and setting**

102 This study is a secondary analysis of a randomized, controlled, open-labelled, single-centre, 2-site,  
103 three-arm (allocation ratio: 1:1:1) parallel-group trial of yoga, aerobic exercise, and protein  
104 supplementation conducted among 232 children (aged 6 to 11 years) [25]. Children were recruited  
105 in two randomly selected government schools in two villages located 60km from Pune, India from  
106 July 13<sup>th</sup> to 25<sup>th</sup> 2018. Parents provided written informed consent, while their children provided  
107 written assent. Ethics approval was obtained from the Hirabai Cowasji Jehangir Medical Research  
108 Institute Ethics Review Committee (ECR/352/Inst/MH/2013/RR-16). The study was registered  
109 with the Clinical Trials Registry - India (CTRI/2018/07/014815). **Figure 1** displays the  
110 recruitment, randomization, and group allocation process to determine the final sample size.  
111 Additional methodological information, including sample size calculations, has been published by  
112 Kasture et al (2023) [25].

113 **Figure 1:** CONSORT diagram depicting study design and participant flow.

### 114 **2.2 Inclusion and Exclusion Criteria**

115 Male children between the ages of 7 and 11 years and female children between the ages of 6 and  
116 10 years were included as evidence indicates that female children attain puberty sooner [35,36].  
117 Additionally, children had to provide MVPA data at baseline and endline to be included in the  
118 analyses of this study. Children using medication known to affect bone/muscle health or with  
119 chronic illnesses were excluded from the study [25].

### 120 **2.3 Recruitment and Randomization**

121 Before enrolment, parents of children (N = 260) who met the age criteria were approached. Only  
122 240 parents and their children provided written informed consent and assent, respectively. To  
123 achieve randomization, a data manager who was not involved in data collection generated a

124 random sequence via a web-based application [37] to randomize children into three mutually  
125 exclusive groups (yoga, aerobic exercise, and control).

## 126 **2.4 The Six-Month Intervention**

127 All children across the three randomized groups (control, yoga, and aerobic exercise) received a  
128 protein supplement (Ladoo) for 6 days a week over six months. The ingredients for the protein  
129 supplement were roasted groundnuts, roasted sesame seeds, fresh dates, skimmed milk powder  
130 and powdered cane sugar [25]. Children in the yoga group engaged in a 30-minute, five-day-a-  
131 week yoga exercise (**Figure 2**) before school. This exercise was a type of yoga called Yogasanas,  
132 which involved engagement in various static poses. The poses required children to use their major  
133 joint and muscle groups, including their trunk, back, hip and knee muscles.

134 Children in the aerobic group engaged in aerobic exercise for 30 minutes, five days a week (**Figure**  
135 **2**). Daily physical exercise involved a five-minute warm-up, a 20-minute core and lower limb  
136 strengthening exercise, and a five-minute cool-down period. In week one, instructors provided  
137 hands-on support and visual demonstration to ensure correct posture for children in both groups.  
138 Thereafter, visual demonstration and verbal guidance were used to engage with children.

139 **Figure 2:** Daily yoga and aerobic exercise intervention regimen

## 140 **2.5 Data Collection**

141 Data collection was obtained both at baseline (before randomization) and endline (after 6 months).  
142 Age, gender, body mass index (BMI), sunlight exposure, dietary intake data, as well as data on the  
143 primary outcome variable, MVPA, were obtained via researcher-administered validated surveys  
144 in the presence of children's caregivers. The Quantification of Physical Activity in School  
145 Children and Adolescents survey was adapted and validated for Indian children before being used  
146 to obtain MVPA data [38,39]. Anthropometry and body composition, including height and weight,  
147 were measured using bioelectrical impedance analysis Tanita Body Composition Analyzer [Model  
148 BC-420MA].

## 149 **2.6 Data analysis**

150 All statistical analyses were conducted in R 4.2.1 [40]. Mean and standard deviation were used to  
151 describe age, BMI, gender, and minutes of MVPA/day. Paired sample t-tests assessed differences

152 in mean MVPA/day within the yoga, aerobic, and control groups from pre- to post-intervention.  
153 Mean differences (MD), defined as the difference in mean MVPA/day between pre-and post-  
154 intervention, were calculated for the three groups. Analysis of variance with post hoc Tukey tests  
155 was used to detect differences in baseline characteristics and MVPA at both pre-and post-  
156 intervention, as well as MD between the three groups. Data analyses were segregated by gender  
157 (male vs. female). Results were deemed statistically significant at  $p < 0.05$ .

### 158 **3. Results**

159 A total of 151 (N) children were included in the final analyses, with the following distribution  
160 across the three groups: yoga (n=50), aerobic exercise (n=49), and control (n=52). The sample  
161 comprised of 54.30% males and 45.70% females. **S1 Table** depicts no statistically significant  
162 differences in the distribution of age and gender between the three groups, both at baseline and  
163 endline. However, there was a statistically significant difference in BMI across the three groups at  
164 endline ( $p=0.015$ ). The mean BMI was 14 at baseline and 14.38 at endline, with children in the  
165 aerobic exercise group having higher body mass index at both time points.

166 **S2 Table** depicts pre- (baseline) and post-intervention (endline) mean MVPA/day differences  
167 within and across the three groups (yoga vs aerobic vs control). These differences are shown in  
168 the overall sample, as well as in the gender-segregated samples (males and females). The mean  
169 MVPA/day in the overall sample was 54.02 minutes/day and 80.15 minutes/day at baseline and  
170 endline, respectively. In the overall sample, mean MVPA/day increased significantly between  
171 baseline and endline within both yoga [mean difference (MD) = 35.85, 95% confidence interval  
172 (CI) = 18.77, 52.92] and aerobic exercise groups [MD=32.21, 95% CI=18.15,46.27]. There was  
173 no significant difference in mean MVPA/day between yoga, aerobic and control groups either at  
174 baseline or endline; however, the yoga group depicted higher MD from baseline to endline  
175 ( $p=0.057$ ).

176 Among males, the mean MVPA/day was 57.53 minutes/day and 98.01 minutes/day at baseline and  
177 endline, respectively. Moreover, mean MVPA/day among males increased from baseline to  
178 endline among all three groups: yoga [MD=35.51, 95% CI=11.47, 59.56], aerobic exercise  
179 [MD=45.97, 95% CI=31.64, 60.31], and control [MD=40.51, 95% CI=13.05, 67.96]. There was  
180 no significant difference in mean MVPA/day between the three groups at baseline or endline;

181 however, the aerobic group showed higher MD from baseline to endline ( $p=0.779$ ). Among  
182 females, the mean MVPA/day was 49.86 minutes/day and 58.93 minutes/day at baseline and  
183 endline, respectively. More importantly, among females, mean MVPA/day increased significantly  
184 between baseline and endline only within the yoga group [MD=36.40, 95% CI=11.52, 61.26], with  
185 MD of MVPA from baseline to endline being significant not only across the three groups  
186 ( $p=0.005$ ) but also being higher among the yoga group in comparison to control ( $p=0.004$ ) and  
187 aerobic exercise ( $p=0.328$ ) groups. **Figure 3** shows three sets of boxplots and density plots  
188 comparing the distribution of MVPA/day at both baseline and endline across all three groups  
189 segregated by overall, male, and female samples. In the overall sample, across all three groups, the  
190 distribution of MVPA/day was skewed at baseline, but the skewness was reduced at endline. In  
191 both gender-segregated samples, a similar skewness in the distribution of MVPA/day was  
192 observed in both yoga and aerobic exercise groups at baseline. Nevertheless, post-intervention  
193 (i.e., at endline), the skewness in the distribution of MVPA/day reduced – similar to the overall  
194 sample, in both males and females.

195 **Figure 3:** Changes in MVPA/day distribution from baseline to endline. Yoga: green, aerobic  
196 exercise: orange, control: purple.

#### 197 **4. Discussion**

198 This study explored the effect of both yoga and aerobic exercise on children's MVPA. The findings  
199 showed that both yoga and aerobic exercise, when consistently incorporated into a randomized  
200 controlled trial over a six-month period, led to statistically significant increases in MVPA levels  
201 among rural children aged 6-11 years. It is also important to note that children who did not receive  
202 either the yoga or aerobic exercise intervention (control group) did not show a statistically  
203 significant increase in their MVPA levels between baseline and endline. However, there were no  
204 differences in pre/post-intervention MVPA levels between the yoga and aerobic exercise groups.  
205 Nevertheless, more nuanced findings were observed after conducting gender-segregated analyses.  
206 Among males, MVPA increased significantly from baseline to endline in all three groups,  
207 including the control group. Among females, MVPA increased from baseline to endline only in  
208 the yoga group, with the change in mean MVPA from baseline to endline being significantly higher  
209 in the yoga group in comparison to the control group.



210 The benefits of aerobic exercise interventions on MVPA levels among children are well  
211 established [5,41,42], and this study adds novel insights to the existing evidence by examining the  
212 effect of aerobic exercise on rural Indian children. While there is an emerging body of evidence –  
213 particularly the use of randomized control trials – to assess the effects of yoga on physical fitness  
214 and mental health [22,26,43–47], a gap in evidence remains regarding the effect of yoga practice  
215 on the overall accumulation of MVPA among children. Thus far, to our knowledge, no study has  
216 examined the impact of yoga practice on the MVPA levels of children, who are at a critical stage  
217 both in terms of physiological development as well as the formation of active living behaviours.

218 There is some evidence from cross-sectional studies showing that yoga is associated with higher  
219 levels of MVPA in adult populations [34]. Among children, studies have primarily focused on the  
220 general health benefits of yoga, such as improvements in mental health [22,26,27], flexibility [48],  
221 and stress reduction [27,49]. This study, however, provides novel insights by linking yoga practice  
222 directly to increased MVPA levels, a key indicator of health [29] and the primary measure that  
223 informs global guidelines on the physical of children and youth [30]. More importantly, our  
224 findings reinforce the findings of a cross-sectional study conducted among children and youth  
225 across 28 cities and villages in India, which found that yoga practice was associated with more  
226 minutes of MVPA per day [20].

227 Another critical finding is that yoga can be a culturally-appropriate alternative or supplement to  
228 aerobic exercise, particularly among Indian children and youth [10,20,25]. The potential to  
229 implement yoga as part of physical activity programming is a significant finding because physical  
230 inactivity among children and youth in India has consistently increased since 2016 [9,10], despite  
231 growing active living policies and programs [10]. It is time to stem this growing physical inactivity  
232 trend by incorporating culturally appropriate and accessible practices such as yoga into routine  
233 pediatric care, health promotion strategies, and school health interventions [10,17,18,25].

234 Yoga, as an alternative to aerobic exercise, might be particularly relevant to rural areas, where  
235 resources and physical activity infrastructure in schools may be limited [50]. As yoga is not only  
236 culturally relevant but also cost-effective and easy to implement [25], there is potential to  
237 incorporate its practice into public health strategies [51]. Moreover, promoting yoga leverages  
238 existing cultural knowledge and practices [10], potentially enhancing community engagement



239 [10,51] and support for physical activity programs [20,52]. As an ancient Indian practice, the  
240 incorporation of culturally-appropriate exercises is also relevant in the context of decolonizing  
241 physical activity [53–57], which requires a holistic approach that integrates health and education  
242 systems [58]. Decolonizing active living entails providing children with diverse physical activity  
243 options which recognize their local heritage and culture – which vary widely across the Indian  
244 subcontinent i.e., can go beyond just yoga to include dance, and martial arts, among other practices  
245 [53,55,59]. Nonetheless, as our findings do not indicate a difference between aerobic exercise and  
246 yoga in improving overall MVPA among children, it is important to note that we do not propose  
247 yoga as a replacement for aerobic exercise – which has immense benefits to children’s health  
248 [5,22,42] – rather it is a practice which warrants consideration for physical activity programs in  
249 the Indian context.

250 The findings also indicate gender-specific effects, with MVPA levels increasing from baseline to  
251 endline in both the yoga and aerobic exercise groups among males, while MVPA levels increasing  
252 only in the yoga group among females. Perhaps most importantly, this change in MVPA from  
253 baseline to endline was significant but not in the control group - suggesting that yoga may be  
254 particularly effective for increasing physical activity levels among female children. This finding  
255 has particular implications in mitigating and/or minimizing barriers to physical activity  
256 accumulation commonly experienced among girls due to cultural norms and societal expectations,  
257 particularly in rural India [9,10]. These findings underscore the importance of considering gender  
258 when designing active living policies and healthcare strategies [60], as gender-specific strategies  
259 are necessary to ensure active living equity [10,61,62].

260 Interestingly, when the distribution of MVPA was explored across the three samples (overall,  
261 males, and females), we found that the baseline distribution of MVPA levels was skewed across  
262 all three groups, with most children engaging in low levels of MVPA. However, in the yoga and  
263 aerobic groups, the MVPA levels not only increased, but the distribution became more normally  
264 distributed at the six-month follow-up. This indicates that children who were not engaging in  
265 sufficient physical activity at baseline not only showed an increase in their MVPA at endline, but  
266 also that the MVPA levels were more evenly distributed (i.e., similar). This observation has  
267 implications for prompting equity in physical activity to ensure that all children, regardless of their  
268 starting point, have the opportunity to improve their health outcomes [51,63,64].

269 This study found that both yoga and aerobic exercise interventions increased MVPA levels among  
270 rural Indian children. Apart from yoga practice and aerobic exercise causing exertion that increases  
271 MVPA accumulation, yoga or aerobic exercise also promotes overall physical fitness [22,25] and  
272 health [7,29,51,65], which naturally leads to an increase in physical activity levels [22,66].  
273 Moreover, yoga has been shown to improve muscle function [22,25], motor function [22–24], and  
274 cardiorespiratory fitness [22] which can enable children to participate in a broad range of physical  
275 activities with greater ease [67].

276 While both yoga and aerobic exercise might contribute to higher MVPA levels, yoga might be  
277 especially pertinent in India not only because it is culturally relevant, but also because it can be  
278 practiced in low-resource settings [25,52,68,69]. This makes yoga accessible to a wider population,  
279 particularly in rural regions where active living infrastructure is limited [50,63,70,71].  
280 Additionally, yoga can be practiced indoors in all weather conditions, an often overlooked  
281 component in promoting active living to counter air pollution, regardless of cultural, built  
282 environment, gender, and safety barriers [8–10] which influence MVPA levels among children  
283 and youth [72–74].

## 284 **5. Strengths and limitations**

285 The randomized controlled design enables a robust comparison between intervention groups and  
286 by minimizing potential biases. The inclusion of a culturally appropriate intervention such as yoga,  
287 provides novelty and relevance, particularly in developing relevant active living policies for  
288 children and youth in India. Moreover, conducting the study in rural Indian schools helps address  
289 another gap in evidence [8–10]. Furthermore, the gender-stratified analyses add another layer of  
290 strength, providing insights into how tailored active living strategies and practices can be  
291 developed to address the gender gap in active living [8–10]. A limitation of this study is the reliance  
292 on self-reported MVPA data, which can be subject to recall bias and inaccuracies, potentially  
293 affecting the reliability of the measurements.

294 Additionally, the study was conducted in only two district schools, which may limit the  
295 generalizability of the findings to other regions or populations. Finally, while the six-month  
296 follow-up period provides valuable insights into the medium-term effects, it does not capture the  
297 long-term sustainability of the interventions. Future studies should be conducted longitudinally

298 over a longer period and with larger samples across the diverse geographic regions in India to  
299 capture the impact of yoga and aerobic exercise on the MVPA of children.

## 300 **6. Conclusions**

301 To our knowledge, this is the first study to examine the impact of yoga and aerobic exercise on  
302 MVPA levels of children. This study demonstrates that both yoga and aerobic exercise can  
303 significantly increase MVPA levels among rural Indian children, highlighting their effectiveness  
304 in promoting physical activity in resource-limited settings. The findings emphasize the value of  
305 culturally-appropriate interventions like yoga, particularly to minimize the gender gap, and enable  
306 equity in active living – findings that can have implications for active living policies and practices  
307 not only in India but across other global south countries that can potentially benefit from  
308 decolonizing active living strategies.

309 **S1 Appendix.** Change in average MVPA of children from baseline to endline.

310 Yoga intervention group: green; aerobic intervention group: orange; and control group: purple.  
311 First panel: overall sample; second panel: male subsample; and third panel: female subsample.

## 312 **Acknowledgements**

313 We acknowledge Hirabai Cowasji Jehangir Medical Research Institute for their support in  
314 obtaining this valuable data, and Heya Desai for her contributions to visualization and collation of  
315 this manuscript. Ethics approval was obtained from Hirabai Cowasji Jehangir Medical Research  
316 Institute Ethics Review Committee (ECR/352/Inst/MH/2013/RR-16).

## 317 **Data availability statement:**

318 The raw data required to reproduce the above findings are available to download from:  
319 <https://doi.org/10.6084/m9.figshare.25970053.v1>.

320

321

322

323

324

325

## 326 **References**

- 327 1. Katzmarzyk PT, Friedenreich C, Shiroma EJ, Lee IM. Physical inactivity and non-  
328 communicable disease burden in low-income, middle-income and high-income countries.  
329 *Br J Sports Med.* 2022 Jan 1;56(2):101–6.
- 330 2. Lee IM, Shiroma EJ, Lobelo F, Puska P, Blair SN, Katzmarzyk PT. Effect of physical  
331 inactivity on major non-communicable diseases worldwide: an analysis of burden of  
332 disease and life expectancy. *The Lancet.* 2012 Jul 21;380(9838):219–29.
- 333 3. Santos AC, Willumsen J, Meheus F, Ilbawi A, Bull FC. The cost of inaction on physical  
334 inactivity to public health-care systems: a population-attributable fraction analysis. *Lancet*  
335 *Glob Health.* 2023 Jan 1;11(1):e32–9.
- 336 4. Shimizu Y. Physical activity [Internet]. Health topics. [cited 2024 May 6]. Available from:  
337 <https://www.who.int/westernpacific/health-topics/physical-activity>
- 338 5. Bull FC, Al-Ansari SS, Biddle S, Borodulin K, Buman MP, Cardon G, et al. World Health  
339 Organization 2020 guidelines on physical activity and sedentary behaviour. *Br J Sports*  
340 *Med.* 2020 Dec 1;54(24):1451–62.
- 341 6. World Health Organization. Physical activity India 2022 country profile [Internet]. Physical  
342 activity India 2022 country profile. 2022 [cited 2024 May 12]. Available from:  
343 <https://www.who.int/publications/m/item/physical-activity-ind-2022-country-profile>
- 344 7. Poitras VJ, Gray CE, Borghese MM, Carson V, Chaput JP, Janssen I, et al. Systematic  
345 review of the relationships between objectively measured physical activity and health  
346 indicators in school-aged children and youth. *Appl Physiol Nutr Metab.* 2016 Jun;41(6  
347 (Suppl. 3)):S197–239.
- 348 8. Katapally TR, Goenka S, Bhawra J, Mani S, Krishnaveni GV, Kehoe SH, et al. Results From  
349 India’s 2016 Report Card on Physical Activity for Children and Youth. *J Phys Act Health.*  
350 2016 Nov 1;13(s2):S176–82.
- 351 9. Bhawra J, Chopra P, Harish R, Mohan A, Ghattu KV, Kalyanaraman K, et al. Results from  
352 India’s 2018 Report Card on Physical Activity for Children and Youth. *J Phys Act Health.*  
353 2018 Jan 2;15(s2):S373–4.
- 354 10. Bhawra J, Khadilkar A, Krishnaveni GV, Kumaran K, Katapally TR. The 2022 India Report  
355 Card on physical activity for children and adolescents. *J Exerc Sci Fit.* 2023 Jan;21(1):74–  
356 82.

- 357 11. Lobelo F, Muth ND, Hanson S, Nemeth BA, COUNCIL ON SPORTS MEDICINE AND  
358 FITNESS, SECTION ON OBESITY, et al. Physical Activity Assessment and Counseling  
359 in Pediatric Clinical Settings. *Pediatrics*. 2020 Mar 1;145(3):e20193992.
- 360 12. Pellerine LP, O'Brien MW, Shields CA, Crowell SJ, Strang R, Fowles JR. Health Care  
361 Providers' Perspectives on Promoting Physical Activity and Exercise in Health Care. *Int J*  
362 *Environ Res Public Health*. 2022 Jan;19(15):9466.
- 363 13. Muth ND, Bolling C, Hannon T, Sharifi M, SECTION ON OBESITY, COMMITTEE ON  
364 NUTRITION. The Role of the Pediatrician in the Promotion of Healthy, Active Living.  
365 *Pediatrics*. 2024 Feb 26;153(3):e2023065480.
- 366 14. Khelo India [Internet]. Khelo India. 2022 [cited 2024 May 13]. Available from:  
367 <https://kheloindia.gov.in/index.html>
- 368 15. Sportz Village Schools - In-School Sports Program [Internet]. Sportz Village Schools –  
369 India's No.1 Sports Education Organization. [cited 2024 May 13]. Available from:  
370 <https://edusports.sportzvillage.com/in-school-sports-program/>
- 371 16. Fit India - Be fit [Internet]. [cited 2024 Jun 1]. Available from: <https://fitindia.gov.in/>
- 372 17. Joo JY, Liu MF. Culturally tailored interventions for ethnic minorities: A scoping review.  
373 *Nurs Open*. 2021;8(5):2078–90.
- 374 18. Horne M, Tierney S, Henderson S, Wearden A, Skelton DA. A systematic review of  
375 interventions to increase physical activity among South Asian adults. *Public Health*. 2018  
376 Sep 1;162:71–81.
- 377 19. Leach MJ, Veziari Y, Flanagan C, Schloss J. Prevalence of Complementary Medicine Use in  
378 Children and Adolescents: A Systematic Review. *J Pediatr Health Care [Internet]*. 2024 Jan  
379 22 [cited 2024 Jun 29];0(0). Available from: [https://www.jpmedhc.org/article/S0891-](https://www.jpmedhc.org/article/S0891-5245(23)00372-3/fulltext)  
380 [5245\(23\)00372-3/fulltext](https://www.jpmedhc.org/article/S0891-5245(23)00372-3/fulltext)
- 381 20. Patel J, Ibrahim S, Bhawra J, Khadilkar A, Katapally TR. Association between yoga and  
382 related contextual factors with moderate-to-vigorous physical activity among children and  
383 youth aged 5 to 17 years across five Indian states. *PeerJ*. 2024 May 31;12:e17369.
- 384 21. Govindaraj R, Karmani S, Varambally S, Gangadhar BN. Yoga and physical exercise – a  
385 review and comparison. *Int Rev Psychiatry*. 2016 May 3;28(3):242–53.

- 386 22. Telles S, Singh N, Bhardwaj AK, Kumar A, Balkrishna A. Effect of yoga or physical  
387 exercise on physical, cognitive and emotional measures in children: a randomized  
388 controlled trial. *Child Adolesc Psychiatry Ment Health*. 2013 Nov 7;7(1):37.
- 389 23. Folleto JC, Pereira KR, Valentini NC. The effects of yoga practice in school physical  
390 education on children's motor abilities and social behavior. *Int J Yoga*. 2016;9(2):156–62.
- 391 24. Barnett LM, Verswijveren SJJM, Colvin B, Lubans DR, Telford RM, Lander NJ, et al.  
392 Motor skill competence and moderate- and vigorous-intensity physical activity: a linear and  
393 non-linear cross-sectional analysis of eight pooled trials. *Int J Behav Nutr Phys Act*. 2024  
394 Feb 7;21(1):14.
- 395 25. Kasture S, Khadilkar A, Padidela R, Gondhalekar K, Patil R, Khadilkar V. Effect of Yoga or  
396 Physical Exercise on Muscle Function in Rural Indian Children: A Randomized Controlled  
397 Trial. *J Phys Act Health*. 2023 Nov 6;21(1):85–93.
- 398 26. Hart N, Fawkner S, Niven A, Booth JN. Scoping Review of Yoga in Schools: Mental Health  
399 and Cognitive Outcomes in Both Neurotypical and Neurodiverse Youth Populations.  
400 *Children*. 2022 Jun;9(6):849.
- 401 27. Kauts A, Sharma N. Effect of yoga on academic performance in relation to stress. *Int J Yoga*.  
402 2009;2(1):39–43.
- 403 28. Cramer H, Lauche R, Langhorst J, Dobos G. Is one yoga style better than another? A  
404 systematic review of associations of yoga style and conclusions in randomized yoga trials.  
405 *Complement Ther Med*. 2016 Apr 1;25:178–87.
- 406 29. US Department of Health and Human Services. Youth Physical Activity Guidelines |  
407 Physical Activity | Healthy Schools | CDC [Internet]. 2022 [cited 2024 May 13]. Available  
408 from: <https://www.cdc.gov/healthyschools/physicalactivity/guidelines.htm>
- 409 30. WHO guidelines on physical activity and sedentary behaviour [Internet]. 2020 [cited 2024  
410 Jun 1]. Available from: <https://www.who.int/publications-detail-redirect/9789240015128>
- 411 31. Larson-Meyer DE. A Systematic Review of the Energy Cost and Metabolic Intensity of  
412 Yoga. *Med Sci Sports Exerc*. 2016 Aug;48(8):1558.
- 413 32. Wang WL, Chen KH, Pan YC, Yang SN, Chan YY. The effect of yoga on sleep quality and  
414 insomnia in women with sleep problems: a systematic review and meta-analysis. *BMC*  
415 *Psychiatry*. 2020 May 1;20(1):195.

- 416 33. Polsgrove MJ, Eggleston BM, Lockyer RJ. Impact of 10-weeks of yoga practice on  
417 flexibility and balance of college athletes. *Int J Yoga*. 2016;9(1):27–34.
- 418 34. Watts AW, Rydell SA, Eisenberg ME, Laska MN, Neumark-Sztainer D. Yoga’s potential for  
419 promoting healthy eating and physical activity behaviors among young adults: a mixed-  
420 methods study. *Int J Behav Nutr Phys Act*. 2018 May 2;15(1):42.
- 421 35. McDowell MA, Brody DJ, Hughes JP. Has age at menarche changed? Results from the  
422 National Health and Nutrition Examination Survey (NHANES) 1999-2004. *J Adolesc*  
423 *Health Off Publ Soc Adolesc Med*. 2007 Jan 23;40(3):227–31.
- 424 36. Puberty: Stages for Boys & Girls [Internet]. Cleveland Clinic. [cited 2024 Jun 2]. Available  
425 from: <https://my.clevelandclinic.org/health/articles/22192-puberty>
- 426 37. RANDOM.ORG - True Random Number Service [Internet]. [cited 2024 Jun 1]. Available  
427 from: <https://www.random.org/>
- 428 38. Barbosa N, Sanchez CE, Vera JA, Perez W, Thalabard JC, Rieu M. A Physical Activity  
429 Questionnaire: Reproducibility and Validity. *J Sports Sci Med*. 2007 Dec 1;6(4):505–18.
- 430 39. Khadilkar AV, Chiplonkar SA, Kajale NA, Ekbote VH, Parathasarathi L, Padidela R, et al.  
431 Impact of dietary nutrient intake and physical activity on body composition and growth in  
432 Indian children. *Pediatr Res*. 2018 Apr;83(4):843–50.
- 433 40. R Core Team. R: A language and environment for statistical computing. [Internet]. R  
434 Foundation for Statistical Computing. 2021 [cited 2024 Jun 1]. Available from:  
435 <https://www.R-project.org/>
- 436 41. Gordon ES, Tucker P, Burke SM, Carron AV. Effectiveness of physical activity  
437 interventions for preschoolers: a meta-analysis. *Res Q Exerc Sport*. 2013 Sep;84(3):287–94.
- 438 42. van der Fels IMJ, Hartman E, Bosker RJ, de Greeff JW, de Bruijn AGM, Meijer A, et al.  
439 Effects of aerobic exercise and cognitively engaging exercise on cardiorespiratory fitness  
440 and motor skills in primary school children: A cluster randomized controlled trial. *J Sports*  
441 *Sci*. 2020 Sep 1;38(17):1975–83.
- 442 43. Varambally S, Holla B, Venkatasubramanian G, Mullapudi T, Raj P, Shivakumar V, et al.  
443 Clinical effects of a yoga-based intervention for patients with schizophrenia — A six-month  
444 randomized controlled trial. *Schizophr Res*. 2024 Jul 1;269:144–51.



- 445 44. Kongkaew C, Lertsinthal P, Jampachaisri K, Mongkhon P, Meesomperm P, Kornkaew K, et  
446 al. The Effects of Thai Yoga on Physical Fitness: A Meta-Analysis of Randomized Control  
447 Trials. *J Altern Complement Med*. 2018 Jun;24(6):541–51.
- 448 45. Lang AJ, Malaktaris A, Maluf KS, Kangas J, Sindel S, Herbert M, et al. A randomized  
449 controlled trial of yoga vs nonaerobic exercise for veterans with PTSD: Understanding  
450 efficacy, mechanisms of change, and mode of delivery. *Contemp Clin Trials Commun*.  
451 2021 Mar 1;21:100719.
- 452 46. Bieber M, Görgülü E, Schmidt D, Zabel K, Etyemez S, Friedrichs B, et al. Effects of body-  
453 oriented yoga: a RCT study for patients with major depressive disorder. *Eur Arch  
454 Psychiatry Clin Neurosci*. 2021;271(7):1217–29.
- 455 47. Yadav SS, Saoji AA, Somanadhapai S, Yadav N lal, Upadhyay J, Rishi NN, et al. Effect of  
456 Yoga-based breathing practices on depression, anxiety, stress, and fear of COVID-19  
457 positive hospitalized patients: A randomized controlled trial. *J Ayurveda Integr Med*. 2024  
458 Mar 1;15(2):100897.
- 459 48. The effects of yoga practice on balance, strength, coordination and flexibility in healthy  
460 children aged 10-12 years - PubMed [Internet]. 2019 [cited 2024 Jun 1]. Available from:  
461 <https://pubmed.ncbi.nlm.nih.gov/31733751/>
- 462 49. James-Palmer A, Anderson EZ, Zucker L, Kofman Y, Daneault JF. Yoga as an Intervention  
463 for the Reduction of Symptoms of Anxiety and Depression in Children and Adolescents: A  
464 Systematic Review. *Front Pediatr* [Internet]. 2020 Mar 13 [cited 2024 Jun 1];8. Available  
465 from: <https://www.frontiersin.org/articles/10.3389/fped.2020.00078>
- 466 50. Pfladderer CD, Burns RD, Byun W, Carson RL, Welk GJ, Brusseau TA. School-based  
467 physical activity interventions in rural and urban/suburban communities: A systematic  
468 review and meta-analysis. *Obes Rev*. 2021;22(9):e13265.
- 469 51. Global action plan on physical activity 2018–2030: more active people for a healthier world  
470 [Internet]. 2018 [cited 2024 Jun 1]. Available from: [https://www.who.int/publications-  
471 detail-redirect/9789241514187](https://www.who.int/publications-detail-redirect/9789241514187)
- 472 52. Mohanty S, Epari V, Yasobant S. Can Yoga Meet the Requirement of the Physical Activity  
473 Guideline of India? A Descriptive Review. *Int J Yoga*. 2020;13(1):3–8.
- 474 53. Knuth AG, Leite GS, Dos Santos SF da S, Crochemore-Silva I. Is It Possible to Decolonize  
475 the Field of Physical Activity and Health? *J Phys Act Health*. 2024 Apr 24;1–3.

- 476 54. Pang B, Balram R, Knijnik J. Decolonization in Sport: Reimagining Embodiment from an  
477 Anthropocosmic Perspective. In: Ravulo J, Olcoñ K, Dune T, Workman A, Liamputtong P,  
478 editors. Handbook of Critical Whiteness: Deconstructing Dominant Discourses Across  
479 Disciplines [Internet]. Singapore: Springer Nature; 2023 [cited 2024 Jun 3]. p. 1–12.  
480 Available from: [https://doi.org/10.1007/978-981-19-1612-0\\_42-1](https://doi.org/10.1007/978-981-19-1612-0_42-1)
- 481 55. Ganneri NR. The Debate on ‘Revival’ and the Physical Culture Movement in Western India  
482 (1900–1950). In: Sport Across Asia. Routledge; 2012.
- 483 56. Alter J. Subaltern Bodies and Nationalist Physiques: Gama the Great and the Heroics of  
484 Indian Wrestling. *Body Soc - BODY SOC*. 2000 Jun 1;6:45–72.
- 485 57. Chakraborty C. The Hindu ascetic as fitness instructor: Reviving faith in yoga. *Int J Hist*  
486 *Sport*. 2007 Sep 1;24:1172–86.
- 487 58. Katapally TR. JMIR Pediatrics and Parenting - Smart Indigenous Youth: The Smart Platform  
488 Policy Solution for Systems Integration to Address Indigenous Youth Mental Health  
489 [Internet]. 2020 [cited 2024 Jun 2]. Available from:  
490 <https://pediatrics.jmir.org/2020/2/e21155/>
- 491 59. Aubert S, Barnes JD, Demchenko I, Hawthorne M, Abdeta C, Nader PA, et al. Global Matrix  
492 4.0 Physical Activity Report Card Grades for Children and Adolescents: Results and  
493 Analyses From 57 Countries. *J Phys Act Health*. 2022 Oct 22;19(11):700–28.
- 494 60. Camacho-Miñano MJ, LaVoi NM, Barr-Anderson DJ. Interventions to promote physical  
495 activity among young and adolescent girls: a systematic review. *Health Educ Res*. 2011  
496 Dec 1;26(6):1025–49.
- 497 61. Bourke M, Haddara A, Loh A, Carson V, Breau B, Tucker P. Adherence to the World Health  
498 Organization’s physical activity recommendation in preschool-aged children: a systematic  
499 review and meta-analysis of accelerometer studies. *Int J Behav Nutr Phys Act*. 2023 Apr  
500 26;20(1):52.
- 501 62. Kretschmer L, Salali GD, Andersen LB, Hallal PC, Northstone K, Sardinha LB, et al. Gender  
502 differences in the distribution of children’s physical activity: evidence from nine countries.  
503 *Int J Behav Nutr Phys Act*. 2023 Sep 4;20(1):103.
- 504 63. Owen KB, Nau T, Reece LJ, Bellew W, Rose C, Bauman A, et al. Fair play? Participation  
505 equity in organised sport and physical activity among children and adolescents in high

- 506 income countries: a systematic review and meta-analysis. *Int J Behav Nutr Phys Act.* 2022  
507 Mar 18;19(1):27.
- 508 64. Gautam N, Dessie G, Rahman MM, Khanam R. Socioeconomic status and health behavior in  
509 children and adolescents: a systematic literature review. *Front Public Health* [Internet].  
510 2023 Oct 17 [cited 2024 Jun 1];11. Available from:  
511 [https://www.frontiersin.org/journals/public-](https://www.frontiersin.org/journals/public-health/articles/10.3389/fpubh.2023.1228632/full)  
512 [health/articles/10.3389/fpubh.2023.1228632/full](https://www.frontiersin.org/journals/public-health/articles/10.3389/fpubh.2023.1228632/full)
- 513 65. Janssen I, LeBlanc AG. Systematic review of the health benefits of physical activity and  
514 fitness in school-aged children and youth. *Int J Behav Nutr Phys Act.* 2010 May 11;7(1):40.
- 515 66. Collins K, Staples K. The role of physical activity in improving physical fitness in children  
516 with intellectual and developmental disabilities. *Res Dev Disabil.* 2017 Oct 1;69:49–60.
- 517 67. Gäbler M, Prieske O, Hortobágyi T, Granacher U. The Effects of Concurrent Strength and  
518 Endurance Training on Physical Fitness and Athletic Performance in Youth: A Systematic  
519 Review and Meta-Analysis. *Front Physiol* [Internet]. 2018 Aug 7 [cited 2024 Jun 2];9.  
520 Available from:  
521 <https://www.frontiersin.org/journals/physiology/articles/10.3389/fphys.2018.01057/full>
- 522 68. Frank R, Larimore J. Yoga as a method of symptom management in multiple sclerosis. *Front*  
523 *Neurosci* [Internet]. 2015 Apr 30 [cited 2024 Jun 2];9. Available from:  
524 <https://www.frontiersin.org/journals/neuroscience/articles/10.3389/fnins.2015.00133/full>
- 525 69. Dhungana RR, Khatiwoda SR, Gurung Y, Pedišić Ž, de Courten M. Yoga for hypertensive  
526 patients: a study on barriers and facilitators of its implementation in primary care. *Glob*  
527 *Health Action.* 2021 Jan 1;14(1):1952753.
- 528 70. Nigg C, Weber C, Schipperijn J, Reichert M, Oriwol D, Worth A, et al. Urban-Rural  
529 Differences in Children’s and Adolescent’s Physical Activity and Screen-Time Trends  
530 Across 15 Years. *Health Educ Behav.* 2022 Oct 1;49(5):789–800.
- 531 71. Müller C, Paulsen L, Bucksch J, Wallmann-Sperlich B. Built and natural environment  
532 correlates of physical activity of adults living in rural areas: a systematic review. *Int J*  
533 *Behav Nutr Phys Act.* 2024 May 3;21(1):52.
- 534 72. Patel J, Katapally TR, Khadilkar A, Bhawra J. The interplay between air pollution, built  
535 environment, and physical activity: Perceptions of children and youth in rural and urban  
536 India. *Health Place.* 2024 Jan 1;85:103167.

- 537 73. Katapally TR, Rainham D, Muhajarine N. Factoring in weather variation to capture the  
538 influence of urban design and built environment on globally recommended levels of  
539 moderate to vigorous physical activity in children. *BMJ Open*. 2015 Nov 1;5(11):e009045.
- 540 74. Mitchell CA, Clark AF, Gilliland JA. Built Environment Influences of Children’s Physical  
541 Activity: Examining Differences by Neighbourhood Size and Sex. *Int J Environ Res Public*  
542 *Health*. 2016 Jan;13(1):130.
- 543

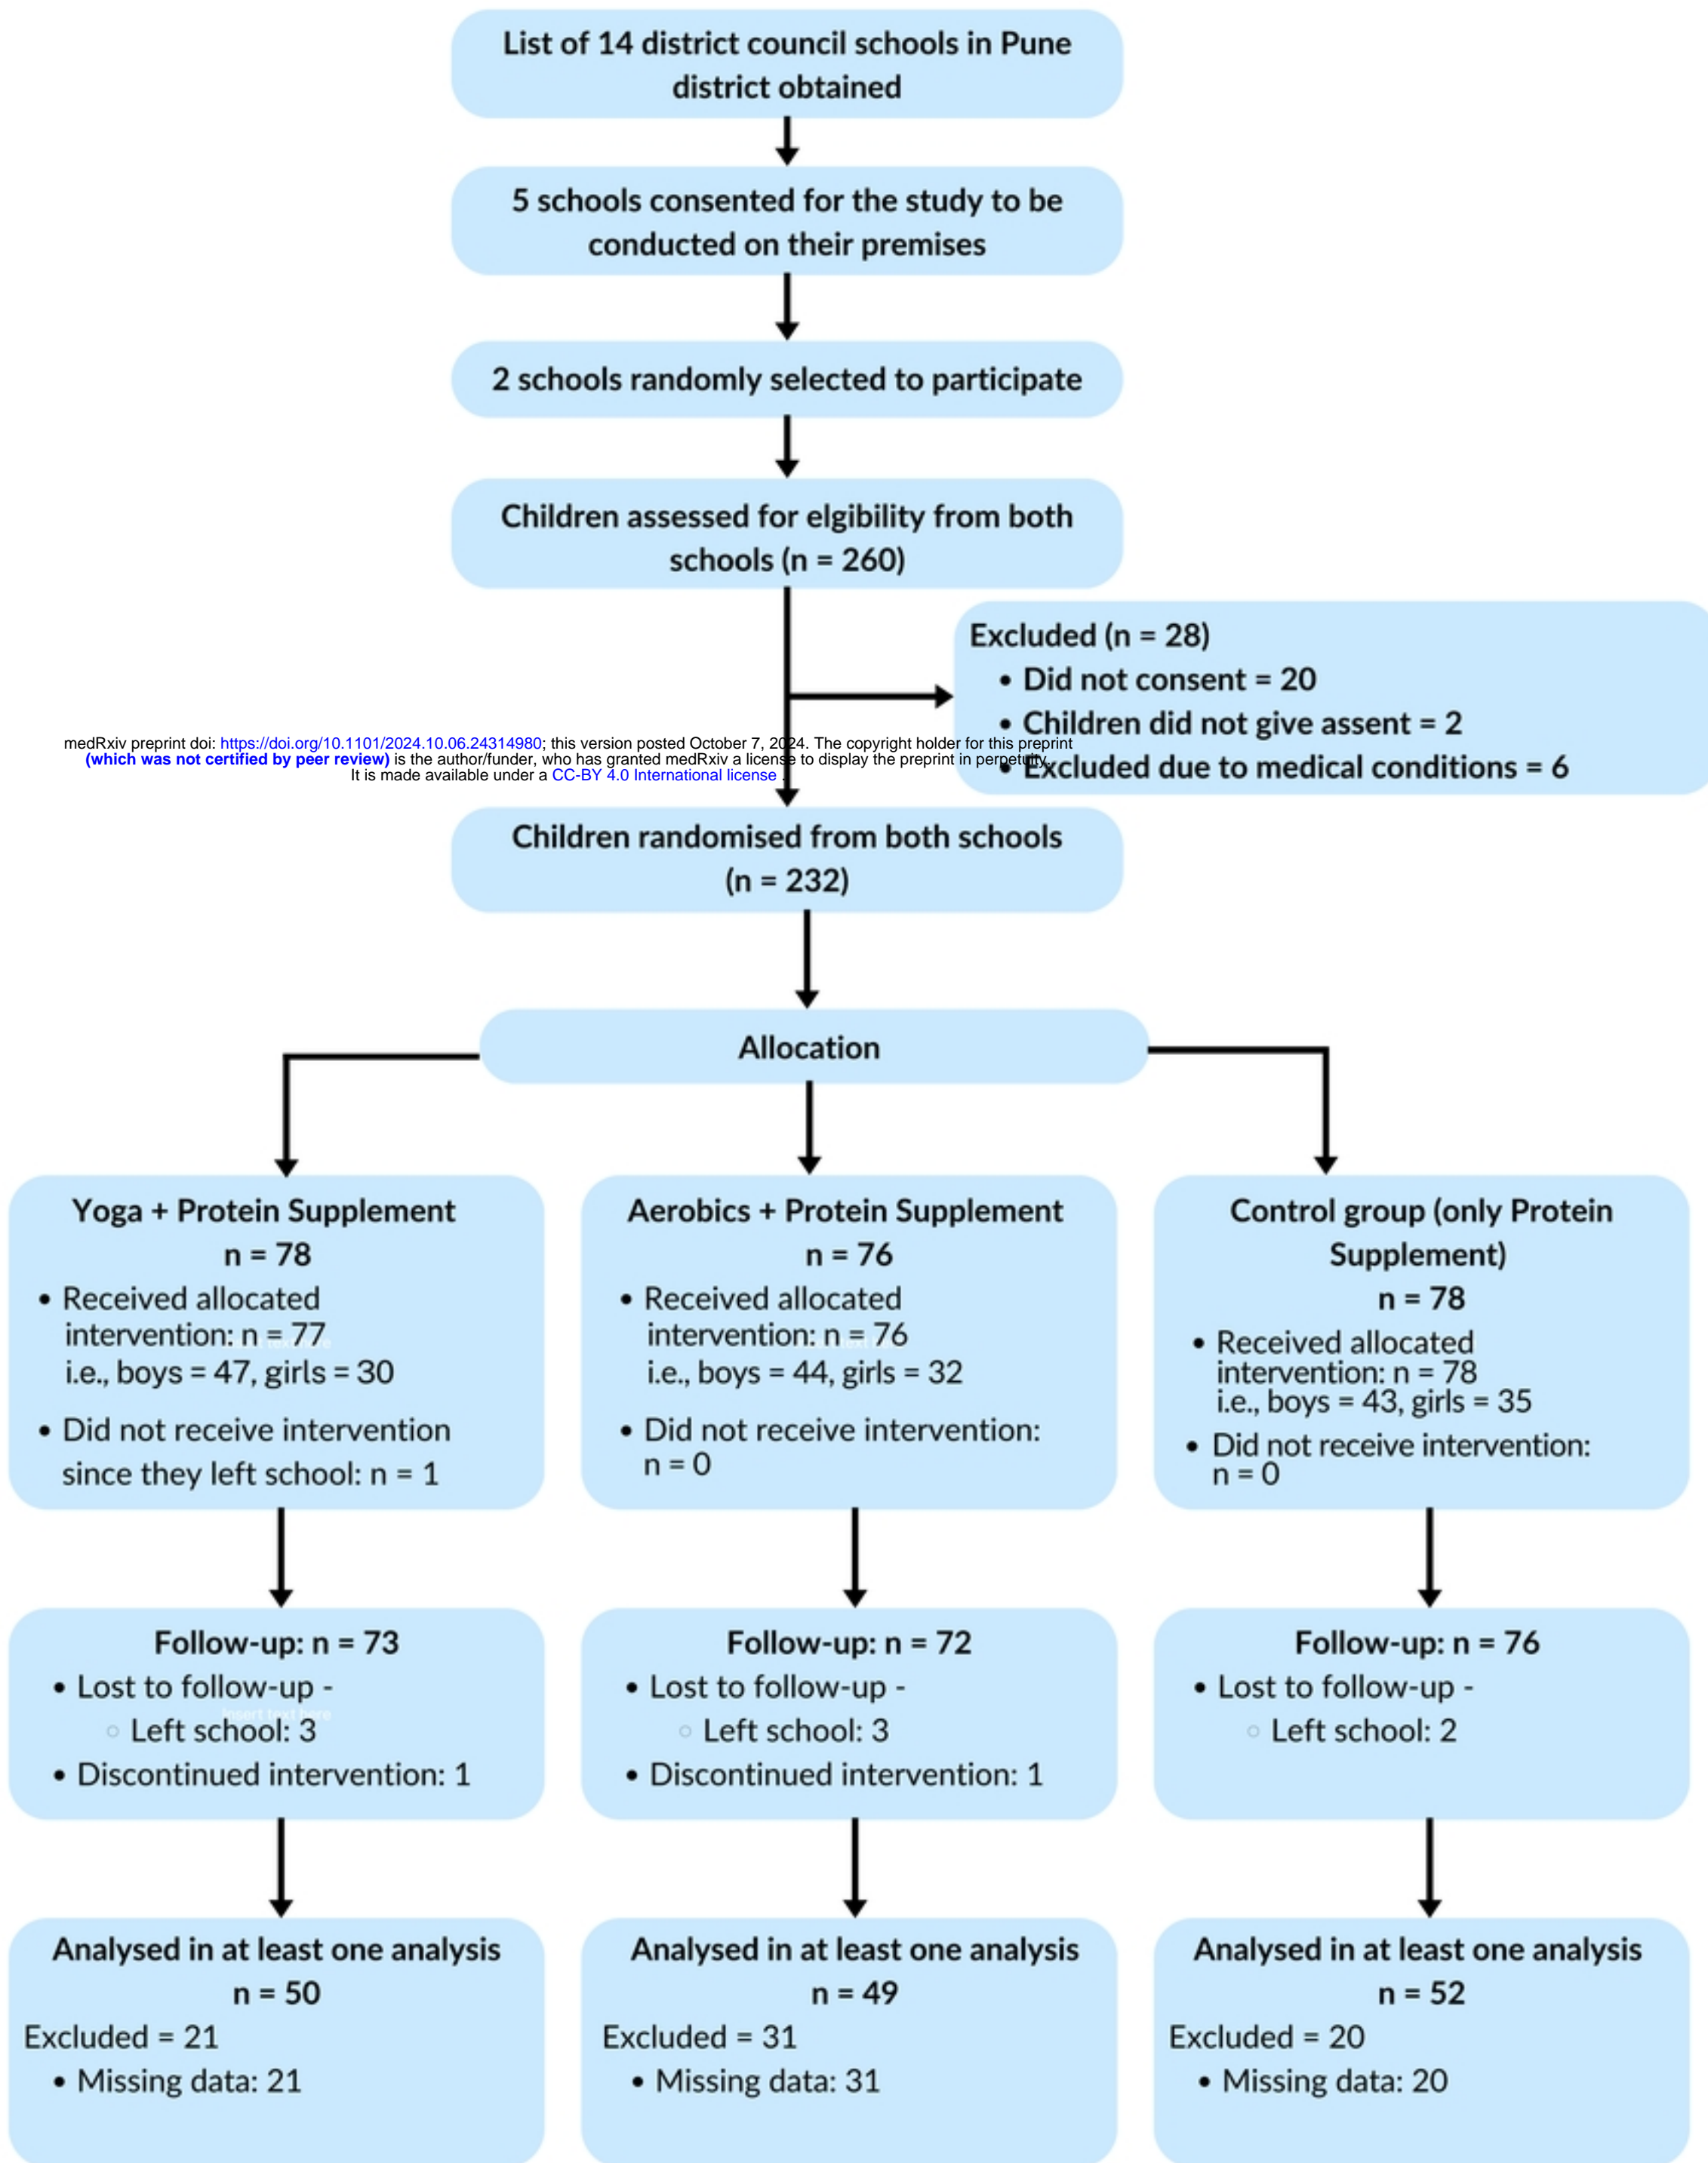

Figure 1



## Yoga Exercise Intervention

| Activity Type         | Yoga Exercises                                                                                                |                                                                                                  |                                                                                                       |                                                                                                          |                                                                                                                |                                                                                                                   |
|-----------------------|---------------------------------------------------------------------------------------------------------------|--------------------------------------------------------------------------------------------------|-------------------------------------------------------------------------------------------------------|----------------------------------------------------------------------------------------------------------|----------------------------------------------------------------------------------------------------------------|-------------------------------------------------------------------------------------------------------------------|
| Warm-up<br>5 min      | Surya namaskar<br>          |                                                                                                  |                                                                                                       |                                                                                                          |                                                                                                                |                                                                                                                   |
| Standing<br>10 min    | Tadasana<br>                 | Vrikshasana<br> | Trikonasana<br>    | Veerbhadrasana<br>    | Prasarita Paduttanasana<br> |                                                                                                                   |
| Sitting<br>6 min      | Parsva Swastikasana<br>      | Parvatasna<br>  | Baddhakonasana<br> | Upavishtakonasana<br> | Janushirsanana<br>          | Halasana-Pashcimottanasana<br> |
| Prone pose<br>2 min   | Bhujangasana<br>             |                                                                                                  |                                                                                                       | Dhanurasana<br>       |                                                                                                                |                                                                                                                   |
| Supine pose<br>2 min  | Chatushpadasana<br>      |                                                                                                  |                                                                                                       |                                                                                                          |                                                                                                                |                                                                                                                   |
| Resting pose<br>5 min | Supta Baddhakonasana<br> |                                                                                                  |                                                                                                       |                                                                                                          |                                                                                                                |                                                                                                                   |

medRxiv preprint doi: <https://doi.org/10.1101/2024.10.06.24314980>; this version posted October 7, 2024. The copyright holder for this preprint (which was not certified by peer review) is the author/funder, who has granted medRxiv a license to display the preprint in perpetuity. It is made available under a [CC-BY 4.0 International license](https://creativecommons.org/licenses/by/4.0/).

## Physical Exercise Intervention

| Activity Type         | Aerobic Exercises                                                                                            |                                                                                                           |                                                                                                         |                                                                                                          |                                                                                                         |                                                                                                                |                                                                                                       |                                                                                                |                                                                                                      |                                                                                                         |
|-----------------------|--------------------------------------------------------------------------------------------------------------|-----------------------------------------------------------------------------------------------------------|---------------------------------------------------------------------------------------------------------|----------------------------------------------------------------------------------------------------------|---------------------------------------------------------------------------------------------------------|----------------------------------------------------------------------------------------------------------------|-------------------------------------------------------------------------------------------------------|------------------------------------------------------------------------------------------------|------------------------------------------------------------------------------------------------------|---------------------------------------------------------------------------------------------------------|
| Warm-up<br>5 min      | Neck rotations<br>        | Shoulder rotations<br> | Wrist rotations<br>  | Waist rotations<br> | Knee rotations<br> | Ankle rotations<br>       | Spot jogging<br> |                                                                                                |                                                                                                      |                                                                                                         |
| Standing<br>10 min    | Stand and Squat<br>       | Windmill<br>           | Knee up hop<br>      | Jumping jacks<br>    | Squat jumps<br>    | Running (on the spot)<br> | Rope jumping<br> | Kicks<br> | Cross jacks<br> | Jump rope hops<br> |
| Sitting<br>6 min      | Hand extensions<br>       | Waist twisting<br>     | Bending forward<br> |                                                                                                          |                                                                                                         |                                                                                                                | Sit thrusts<br>  |                                                                                                |                                                                                                      |                                                                                                         |
| Prone pose<br>2 min   | Mountain climber<br>    |                                                                                                           |                                                                                                         |                                                                                                          |                                                                                                         |                                                                                                                |                                                                                                       |                                                                                                |                                                                                                      |                                                                                                         |
| Supine pose<br>2 min  | Straight leg raises<br> |                                                                                                           |                                                                                                         |                                                                                                          |                                                                                                         |                                                                                                                |                                                                                                       |                                                                                                |                                                                                                      |                                                                                                         |
| Resting pose<br>5 min | Lying down<br>          |                                                                                                           |                                                                                                         |                                                                                                          |                                                                                                         |                                                                                                                |                                                                                                       |                                                                                                |                                                                                                      |                                                                                                         |

Figure 2

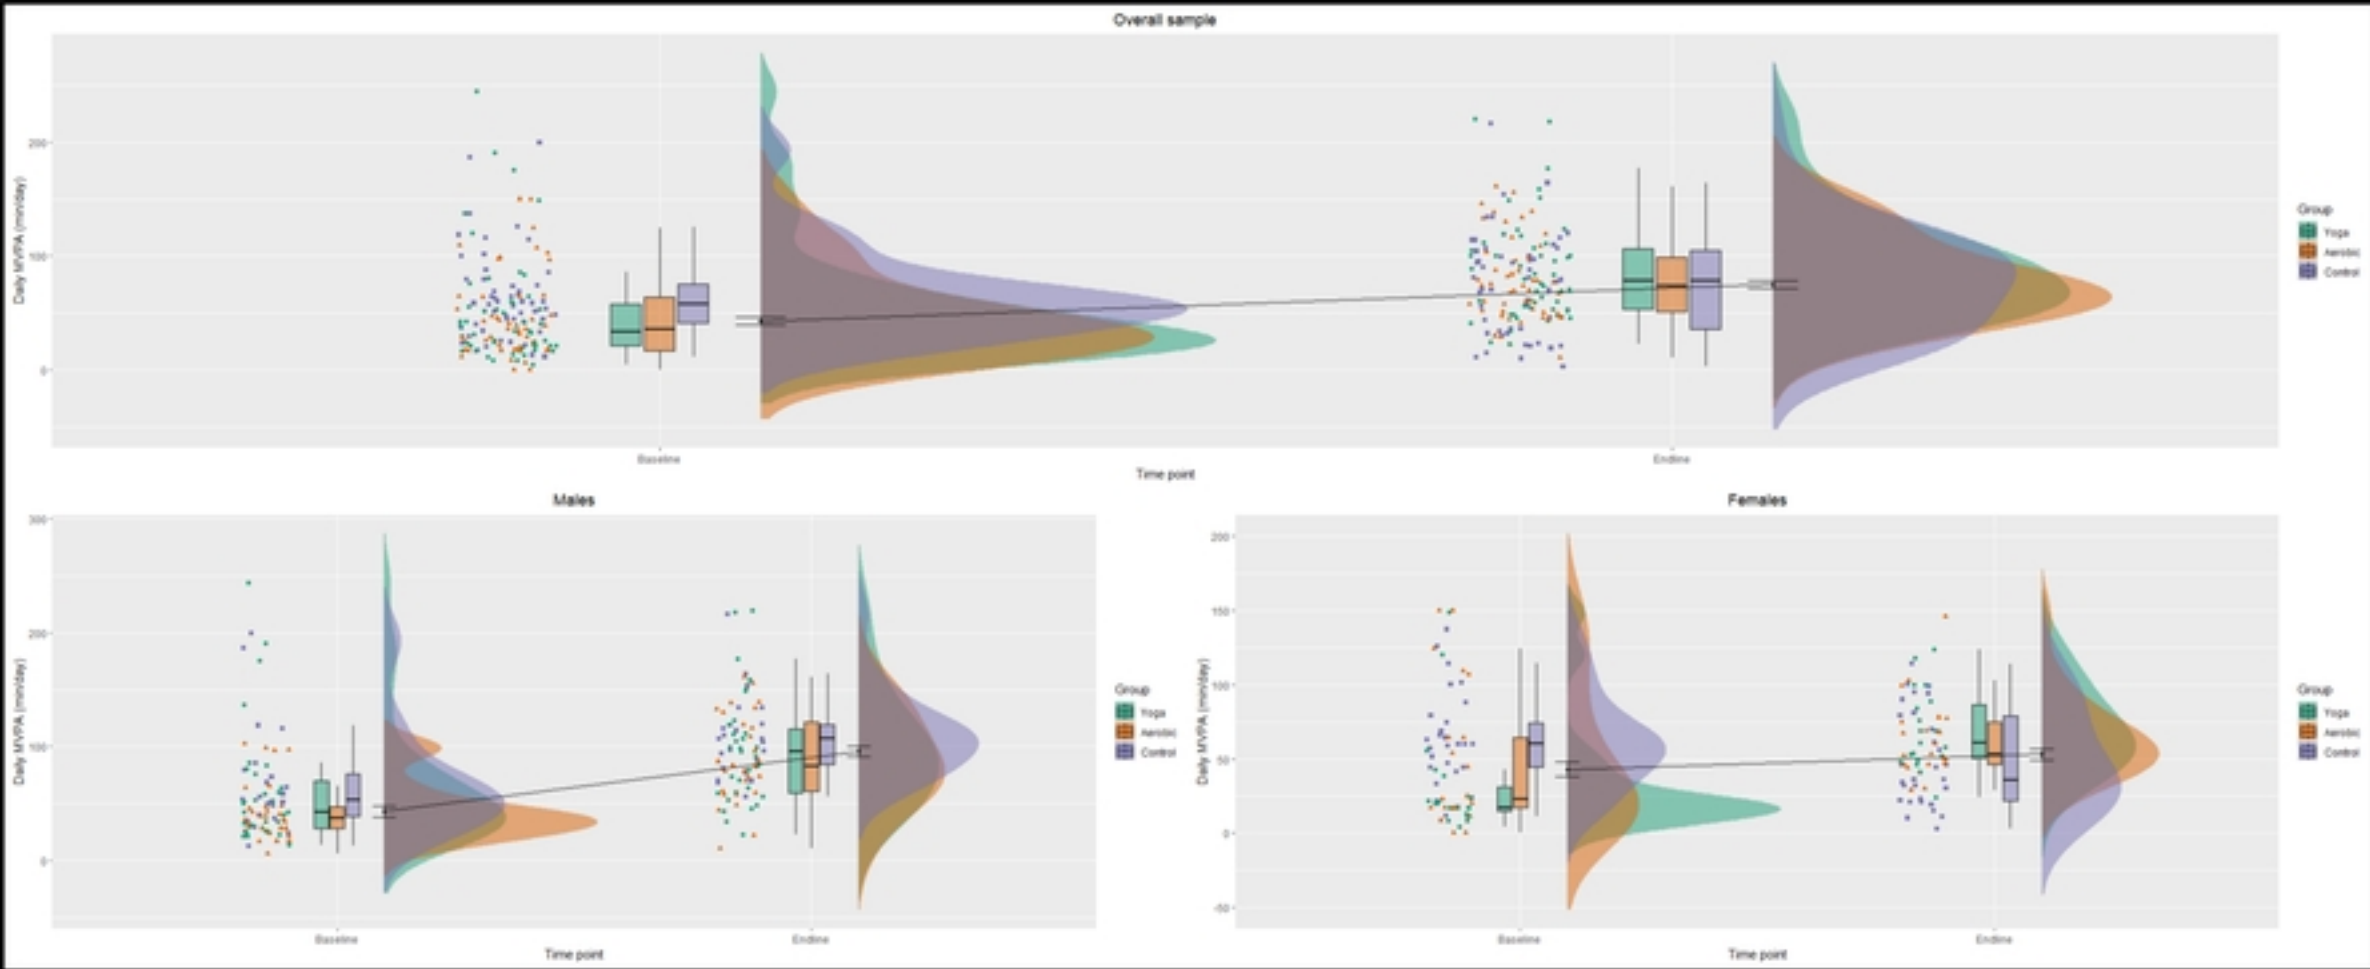

Figure 3
